# Supplementary material
Source: publisher figshare collection journal article supplement (https://karger.figshare.com/ndownloader/files/24089612)
Supplement: Supplementary file 1 [file 24089612]

## Sheet: SPERM_survey
Supplementary Table S1. Characterization of the proteins collected into the SPERM sample
Gene Symbols and Ensembl Stable IDs were retrieved for the UniProtKB IDs reported in the Supplementary Table to Amaral et al. (2014), employing Ensembl's BioMart mining tool (Ensembl Genes 98).
Amaral et al. (2014): Amaral A, Castillo J, Ramalho-Santos J, Oliva R. The combined human sperm proteome: cellular pathways and implications for basic and clinical science. Hum Reprod Update. 2014; 20: 40–62.
	Stable Gene ID		Stable Protein ID		UniProtKB Gene Name symbol		UniProtKB/Swiss-Prot ID		Determination of proteins in the SPERM sample in six core studies on the human sperm proteome (according to Amaral et al., 2014): for complete refrences, see sheet Six_core_studies		Determination of proteins in the SPERM sample in additional studies on human sperm proteins: for complete references, see sheet Additional_studies		Determination of proteins in the SPERM sample in additional studies on non-human mammalian sperm proteins: for complete references, see sheet Additional_studies		Determination of proteins in the SPERM sample in proteomic analyses of human spermatozoa, with the raw data deposited at ProteomeXchange: for complete references, see sheet ProteomeXchange		Determination of proteins in the SPERM sample in proteomic analyses of non-human mammalian spermatozoa, with the raw data deposited at ProteomeXchange: for complete references, see sheet ProteomeXchange		Expression of proteins in the SPERM sample in human testis; checked for five genes only: for complete reference, see sheet Testis_expression		Expression of proteins in the SPERM sample in non-human mammalian testis; checked for five genes only: for complete reference, see sheet Testis_expression
	ENSG00000113140		ENSP00000231061		SPARC		P09486		Wang et al., 2013		Zhou et al., 2015		Skerget et al., 2013		yes
	ENSG00000072041		ENSP00000266682		SLC6A15		Q9H2J7		Gu et al., 2011				Mendonça et al., 2017		yes
	ENSG00000145715		ENSP00000274376		RASA1		P20936		Wang et al., 2013		Zhou et al., 2015				yes
	ENSG00000156273		ENSP00000286800		BACH1		O14867		Wang et al., 2013						yes
	ENSG00000087111		ENSP00000309430		PIGS		Q96S52		Wang et al., 2013						yes
	ENSG00000145220		ENSP00000345917		LYAR		Q9NX58		Wang et al., 2013		Zhou et al., 2015		Skerget et al., 2013; Mendonça et al., 2017		yes
	ENSG00000107938		ENSP00000349244		EDRF1		Q3B7T1		Baker et al., 2013				Skerget et al., 2013; Mendonça et al., 2017		yes
	ENSG00000197150		ENSP00000351717		ABCB8		Q9NUT2		Wang et al., 2013		Zhou et al., 2015				yes
	ENSG00000157870		ENSP00000394405		PRXL2B		Q8TBF2		Wang et al., 2013						yes
	ENSG00000075218		ENSP00000415430		GTSE1		Q9NYZ3		Baker et al., 2007, 2013				Mendonça et al., 2017		yes
	ENSG00000086827		ENSP00000200135		ZW10		O43264		Wang et al., 2013		Zhou et al., 2015		Mendonça et al., 2017		yes
	ENSG00000103035		ENSP00000219313		PSMD7		P51665		Amaral et al., 2013; Wang et al., 2013		Zhou et al., 2015				yes
	ENSG00000105514		ENSP00000222120		RAB3D		O95716		Wang et al., 2013		Zhou et al., 2015				yes
	ENSG00000105819		ENSP00000249269		PMPCB		O75439		Wang et al., 2013		Zhou et al., 2015		Skerget et al., 2013		yes
	ENSG00000129354		ENSP00000250244		AP1M2		Q9Y6Q5		Wang et al., 2013		Zhou et al., 2015				yes
	ENSG00000036672		ENSP00000260187		USP2		O75604		Wang et al., 2013		Zhou et al., 2015		Skerget et al., 2013; Mendonça et al., 2017		yes
	ENSG00000015413		ENSP00000261615		DPEP1		P16444		Baker et al., 2007; Wang et al., 2013		Zhou et al., 2015				yes
	ENSG00000088682		ENSP00000262507		COQ9		O75208		Wang et al., 2013		Zhou et al., 2015				yes
	ENSG00000053501		ENSP00000263897		USE1		Q9NZ43		Wang et al., 2013						yes
	ENSG00000110169		ENSP00000265983		HPX		P02790		Wang et al., 2013		Zhou et al., 2015				yes
	ENSG00000156709		ENSP00000287295		AIFM1		O95831		Baker et al., 2007; Amaral et al., 2013; Baker et al., 2013; Wang et al., 2013		Zhou et al., 2015		Mendonça et al., 2017		yes
	ENSG00000141295		ENSP00000290216		SCRN2		Q96FV2		Wang et al., 2013		Zhou et al., 2015		Skerget et al., 2013		yes
	ENSG00000121380		ENSP00000309132		BCL2L14		Q9BZR8		Wang et al., 2013		Zhou et al., 2015				yes
	ENSG00000178035		ENSP00000321584		IMPDH2		P12268		Wang et al., 2013		Zhou et al., 2015		Skerget et al., 2013		yes
	ENSG00000182551		ENSP00000333666		ADI1		Q9BV57		Wang et al., 2013		Zhou et al., 2015		Skerget et al., 2013		yes
	ENSG00000161048		ENSP00000340093		NAPEPLD		Q6IQ20		Wang et al., 2013		Zhou et al., 2015				yes
	ENSG00000120253		ENSP00000342262		NUP43		Q8NFH3		Wang et al., 2013		Zhou et al., 2015		Skerget et al., 2013		yes
	ENSG00000135951		ENSP00000347161		TSGA10		Q9BZW7		Baker et al., 2007, 2013; Wang et al., 2013; Amaral et al., 2013		Zhou et al., 2015				yes
	ENSG00000105393		ENSP00000352408		BABAM1		Q9NWV8		Wang et al., 2013		Martinez-Heredia et al., 2006; de Mateo et al., 2007; Zhou et al., 2015				yes
	ENSG00000143369		ENSP00000358045		ECM1		Q16610		Wang et al., 2013		Zhou et al., 2015				yes
	ENSG00000162616		ENSP00000359799		DNAJB4		Q9UDY4		Wang et al., 2013		Zhou et al., 2015		Skerget et al., 2013		yes
	ENSG00000137269		ENSP00000359925		LRRC1		Q9BTT6		Wang et al., 2013		Zhou et al., 2015		Skerget et al., 2013; Mendonça et al., 2017		yes
	ENSG00000101146		ENSP00000360286		RAE1		P78406		Baker et al., 2007; Wang et al., 2013		Zhou et al., 2015				yes
	ENSG00000030066		ENSP00000367721		NUP160		Q12769		Amaral et al., 2013; Wang et al., 2013		Zhou et al., 2015		Skerget et al., 2013		yes
	ENSG00000110075		ENSP00000377390		PPP6R3		Q5H9R7		Wang et al., 2013		Zhou et al., 2015		Skerget et al., 2013		yes
	ENSG00000173039		ENSP00000384273		RELA		Q04206		Wang et al., 2013		Zhou et al., 2015		Mendonça et al., 2017		yes
	ENSG00000145041		ENSP00000393183		DCAF1		Q9Y4B6		Baker et al., 2013; Wang et al., 2013				Skerget et al., 2013		yes
	ENSG00000021826		ENSP00000402608		CPS1		P31327		Baker et al., 2013; Wang et al., 2013				Skerget et al., 2013		yes
	ENSG00000187535		ENSP00000406012		IFT140		Q96RY7		Amaral et al., 2013; Baker et al., 2013; Wang et al., 2013		Zhou et al., 2015		Skerget et al., 2013		yes
	ENSG00000136279		ENSP00000417653		DBNL		Q9UJU6		Wang et al., 2013		Zhou et al., 2015				yes
	ENSG00000183207		ENSP00000473172		RUVBL2		Q9Y230		Baker et al., 2007; Amaral et al., 2013; Baker et al., 2013; Wang et al., 2013		Martinez-Heredia et al., 2006; de Mateo et al., 2007; Lefièvre et al., 2007; Vigodner et al., 2013; Zhou et al., 2015		Skerget et al., 2013		yes
	ENSG00000172771		ENSP00000420854		EFCAB12		Q6NXP0		Wang et al., 2013		Skerget et al., 2013		Skerget et al., 2013		yes
	ENSG00000108961		ENSP00000226105		RANGRF		Q9HD47		Wang et al., 2013; Amaral et al., 2013		de Mateo et al., 2011; Zhou et al., 2015		Mendonça et al., 2017		yes
	ENSG00000182580		ENSP00000332118		EPHB3		P54753		Gu et al., 2011		Skerget et al., 2013		Skerget et al., 2013		yes
	ENSG00000010318		ENSP00000333024		PHF7		Q9BWX1		Wang et al., 2013		de Mateo et al., 2011; Skerget et al., 2013; Zhou et al., 2015		Skerget et al., 2013		yes
	ENSG00000075651		ENSP00000342793		PLD1		Q13393		Wang et al., 2013		Skerget et al., 2013; Zhou et al., 2015		Skerget et al., 2013		yes
	ENSG00000143443		ENSP00000357922		MENT		Q9BUN1		Nixon et al., 2010; Amaral et al., 2013; Baker et al., 2013; Wang et al., 2013		Paash et al., 2011; Zhou et al., 2015				yes
	ENSG00000250565		ENSP00000304891		ATP6V1E2		Q96A05		Amaral et al., 2013; Baker et al., 2013; Wang et al., 2013		Zhou et al., 2015				yes		yes
	ENSG00000179091		ENSP00000317159		CYC1		P08574		Baker et al., 2007; Amaral et al., 2013; Baker et al., 2013; Wang et al., 2013		de Mateo et al., 2011; Zhou et al., 2015		Mendonça et al., 2017		yes		yes
	ENSG00000094914		ENSP00000209873		AAAS		Q9NRG9		Wang et al., 2013; Baker et al. 2013		de Mateo et al., 2011; Zhou et al., 2015				yes		yes
	ENSG00000121680		ENSP00000241041		PEX16		Q9Y5Y5		Amaral et al., 2013		Zhou et al., 2015				yes		yes
	ENSG00000135624		ENSP00000258091		CCT7		Q99832		Amaral et al., 2013; Baker et al., 2013; Wang et al., 2013		Zhou et al., 2015		Skerget et al., 2013		yes		yes
	ENSG00000168944		ENSP00000303058		CEP120		Q8N960		Wang et al., 2013		Zhou et al., 2015				yes		yes
	ENSG00000198752		ENSP00000355237		CDC42BPB		Q9Y5S2		Wang et al., 2013		Zhou et al., 2015		Skerget et al., 2013		yes		yes
	ENSG00000119139		ENSP00000438262		TJP2		Q9UDY2		Wang et al., 2013		Zhou et al., 2015				yes		yes
	ENSG00000100056		ENSP00000252137		ESS2		Q96DF8		Wang et al., 2013				Skerget et al., 2013				yes
	ENSG00000065491		ENSP00000362590		TBC1D22B		Q9NU19		Wang et al., 2013				Skerget et al., 2013				yes
	ENSG00000112139		ENSP00000402584		MDGA1		Q8NFP4		Gu et al., 2011; Baker et al., 2013				Skerget et al., 2013				yes
	ENSG00000127870		ENSP00000342121		RNF6		Q9Y252		Baker et al., 2007; Wang et al., 2013
	ENSG00000079459		ENSP00000220584		FDFT1		P37268		Gu et al., 2011; Wang et al., 2013
	ENSG00000163069		ENSP00000370839		SGCB		Q16585		Gu et al., 2011		Martinez-Heredia et al., 2006; de Mateo et al., 2007
	ENSG00000107968		ENSP00000263056		MAP3K8		P41279		Baker et al., 2013		Silva et al., 2015		Skerget et al., 2013
	ENSG00000145198		ENSP00000398688		VWA5B2		Q8N398		Gu et al., 2011		Skerget et al., 2013		Skerget et al., 2013
	ENSG00000158042		ENSP00000288937		MRPL17		Q9NRX2		Wang et al., 2013		Skerget et al., 2013
	ENSG00000115138		ENSP00000264708		POMC		P01189		Gu et al., 2011		Urizar-Arenaza et al., 2015
	ENSG00000001631		ENSP00000344668		KRIT1		O00522		Wang et al., 2013		Zhou et al., 2015
	ENSG00000078269		ENSP00000347792		SYNJ2		O15056		Wang et al., 2013		Zhou et al., 2015		Skerget et al., 2013
	ENSG00000130758		ENSP00000253055		MAP3K10		Q02779		Baker et al., 2007				Skerget et al., 2013
	ENSG00000077063		ENSP00000160373		CTTNBP2		Q8WZ74		Baker et al., 2013				Skerget et al., 2013
	ENSG00000063761		ENSP00000238561		ADCK1		Q86TW2		Gu et al., 2011				Skerget et al., 2013
	ENSG00000136404		ENSP00000317000		TM6SF1		Q9BZW5		Gu et al., 2011				Skerget et al., 2013
	ENSG00000149571		ENSP00000435466		KIRREL3		Q8IZU9		Baker et al., 2013				Skerget et al., 2013
	ENSG00000106799		ENSP00000364133		TGFBR1		P36897		Baker et al., 2013										RNA		Itman et al., 2006
	ENSG00000161647		ENSP00000381425		MPP3		Q13368		Gu et al., 2011										RNA + protein
	ENSG00000169047		ENSP00000304895		IRS1		P35568		Nixon et al., 2010										RNA + protein
	ENSG00000035115		ENSP00000348471		SH3YL1		Q96HL8		Wang et al., 2013										RNA + protein
	ENSG00000198218		ENSP00000350094		QRICH1		Q2TAL8		Wang et al., 2013										RNA + protein

## Sheet: Six_core_studies
Supplementary Table S1. Characterization of the proteins collected into the SPERM sample
References to six core studies on the human sperm proteome reporting proteins in the SPERM sample (according to Amaral et al., 2014)
	Baker et al. 2007		Baker MA, Reeves G, Hetherington L, Muller J, Baur I, Aitken RJ. Identification of gene products present in Triton X-100 soluble and insoluble fractions of human spermatozoa lysates using LC-MS/MS analysis. Proteomics Clin Appl 2007; 1: 524–532.
	Proteomics Clin Appl 2007; 1: 524–532.		SDS-PAGE plus LC-MS/MS
			"This achieved 48 bands from each lane, which constituted a total of 96 fractions. Individual polyacrylamide gel plugs were washed…"
			"Separation of tryptic peptide mixtures was achieved by nano-scale RP-LC in combination with online ESI-MS. For the HPLC separation, a nano-MDLC system (Ettan MDLC, GEHealthcare, Piscataway, NJ, USA) was used, employing alinear gradient…"
			"MS analysis was performed on an LTQ linear ion trap system (Thermo Finnigan, SanJose, CA, USA). For online coupling, a nano ion spray source was used, equipped with a New Objective ESI needle (30-mmtip). The needle voltage was 1.6 kV in positive ion mode. The scan cycle consisted of a survey scan (mass range 500–1400 amu) followed by MS/MS of the three most intense signals in the spectrum with a…
			"The derived MS datasets were converted to TurboSequest generic format (*.dta) and searched against the IPI database (version 3.19.6) with the species subset Homo sapiens usingthe TurboSequest search algorithm…"
			"A protein hit was based on at least two identified peptides from the same molecule."
	Baker et al. 2013		Baker MA, Naumovski N, Hetherington L,Weinberg A, Velkov T, Aitken RJ. Head and flagella subcompartmental proteomic analysis of human spermatozoa. Proteomics 2013; 13: 61–74.
	Proteomics 2013; 13: 61–74		SDS-PAGE plus LC-MS/MS
			"Fractionation of the material was achieved by dissecting uniform pieces of the gel (1-mm wide bands) from both the head and tail lanes. In total, this generated 48 bands from each lane, 96 fractions in total. Individual polyacrylamide gel plugs were washed..."
			"For all experiments, an Ultimate3000 ultra high-pressure LCsystem (Dionex, Castle Hill, Sydney) was used equipped with a ternary low pressure mixing gradient pump (LPG-3600), a membrane degasser unit (SRD-3600), a temperature-controlled pulled-loop autosampler (WPS-3000T) and a temperature controlled column oven with flow manager (FLM-3100). The LC experiments were performed using the“preconcent…
			"For the identification of phosphopeptides, separate CID andelectron transfer dissociation (ETD) experiments were performed using an AmaZon ETD Ion Trap (Bruker Daltonik GmbH, Preston, VIC, Australia) equipped with an onlinenano-sprayer spraying from a 0.090 mm id and 0.02 mm id fused silica capillary to avoid any loss of phosphopeptides. Fine tuning was achieved using the smart parameter setting…
			"In order to exclude false positive identifications, peptides with Mascot scores below 35 (chosen on the basis of manual evaluation of the MS/MS data of peptides with scores below this number) were rejected. The identified protein sequences were manually validated in BioTools (Bruker Daltonics, Bremen, Germany) on a residue-by-residue basis using the raw data to ensure accuracy. In brief, the ion…
			“...every singleton was manually validated on a residue-by-residue basis. Using this approach, the extent of the rejection rate, based on a MASCOT score of 35 was extremely high. In the case of the tail-fraction identifications, 42% of the reported proteins were rejected after manual validation. This is well above the nominal 1% reported when researchers reverse a database and rerun their data to…
	Gu et al. 2011		Gu B, Zhang J, Wu Y, Zhang X, Tan Z, Lin Y, Huang X, Chen L, Yao K, Zhang M. Proteomic analyses reveal common promiscuous patterns of cell surface proteins on human embryonic stem cells and sperms. PLoS One 2011; 6: e19386.
	PLoS One 2011; 6: e19386		SDS-PAGE plus LC-MS/MS
			"Purified proteins were separated by 12.5% SDS-PAGE. Following electrophoresis, gels were stained with Coomassie Blue. Gels were then dissected and subjected to LC-MS/MS analysis."
			"Peptides from each band were separated on a Paradigm MS4N Nano/Capillary HS MDLC (Michrom Bioresources, Inc., USA) using a 100 mm 6150 mm C-18 reversed phase column. LC separation was conducted on a linear gradient of 5–35% buffer B for 50 min, followed by 35–90% buffer B for 10 min and 90% buffer B for 10 min... Separated peptides were then analysed on an LTQ-MS (Thermol, USA) coupled to a Mich…
			"Peak list files were generated using Bioworks software (Applied Biosystems) using the default parameters. They were searched against databases for protein identification using the Sequest software."
			"Two non-redundant peptides were identified in each unique protein."
	Nixon et al. 2010 (is actually be 2011)		Nixon B, Mitchell LA, Anderson AL, McLaughlin EA, O’bryan MK, Aitken RJ. Proteomic and functional analysis of human sperm detergent resistant membranes. J Cell Physiol 2011; 226: 2651–2665
	J Cell Physiol 2011; 226: 2651–2665		SDS-PAGE plus LC-MS/MS
			"For the purpose of 1D SDS–PAGE, equivalent volumes of fractionated protein suspensions..."
			"For 2D SDS–PAGE, the low-density fraction identified as being enriched for GM1 gangliosides and SGG by dot blotting..."
			"The proteins...were identified using an LC/MS/MS interface"
			"The sample was injected onto a Michrome Peptide Captrap pre-column for concentration and desalting... The pre-column was then switched into line with the analytical column containing C18 RP silica... Peptides were eluted from the column using a solvent gradient... The LC eluent was subjected to positive ion nanoflow electrospray analysis on an Applied Biosystems QSTAR mass spectrometer (ABI, Fos…
			"The LC/MS/MS data were searched through the MASCOT search engine using the NCBI non-redundant protein database."
			"Only significant hits as defined by MASCOT probability analysis were considered. In addition, at least two peptide matches with ion scores above 35 was set as the threshold for acceptance of positive identifications."
			"proteomic analysis of DRMs, were each replicated a minimum of three times."
	Wang et al. 2013		Wang G, Guo Y, Zhou T, Shi X,Yu J, Yang Y, Wu Y, Wang J, Liu M, Chen X et al. In-depth proteomic analysis of the human sperm reveals complex protein compositions. J Proteomics 2013; 79: 114–122.
	J Proteomics 2013; 79: 114–122		In-solution digest plus LC-MS/MS
			"...in-solution digests were loaded onto a strong-cation exchange column (1 mm ID×10 cm, packed with Poros 10S, Dionex, Sunnyvale, CA) for fractionation..."
			"...fractions were collected every 2 min, and 20 fractions were obtained. The experiments were repeated for 3 times."
			"For capillary reverse-phase liquid chromatography (LC) and mass spectrometric analysis, each fraction was directly loaded onto a μ-precolumn™ cartridge....The trap column effluent was then transferred to a reverse-phase microcapillary column...The reverse-phase separation of peptides was performed using the following buffers..."
			"Peptide analysis was performed using a LTQ Orbitrap Velos (ThermoFisher Scientific, San Jose, CA) coupled directly to an LC column. An MS survey scan was obtained for the m/z range 350–1800, and MS/MS spectra were acquired from the survey scan for the 20 most intense ions (as determined by Xcalibur mass spectrometer software in real time). Dynamic mass exclusion windows..."
			"RAW files for LC–MS/MS identification were processed by MaxQuant (v1.2.2.5), and identified with the Andromeda [their Reference 15]"
			"The false discovery rate (FDR) of the identified peptides and proteins was estimated by searching against the database with the reversed amino acid sequence [their reference 15]."
			"...we controlled the FDR to 1% at both the peptide and protein levels using a reversed sequence database by MaxQuant…"
			"...unique peptides, that corresponded to 4675 unique proteins, using an advanced LTQ Orbitrap Velos mass spectrometer. Of the 4675 proteins, 4401 proteins (94%) were identified in two independent experiments, and the detailed single peptide-based identification data including annotated mass spectra are presented in…"
			"Of the 4675 proteins, 4401 proteins (94%) were identified in two independent experiments, and the detailed single peptide-based identification data including annotated mass spectra are presented in…"
			"Only peptides that were a minimum of six amino acids in length and had a FDR of 1% were considered for identification."
	Amaral et al. 2013		Amaral A, Castillo J, Estanyol JM, Ballescà JL, Ramalho-Santos J, Oliva R. Human sperm tail proteome suggests new endogenous metabolic pathways. Mol Cell Proteomics 2013; 12: 330–342.
	Mol Cell Proteomics 2013; 12: 330–342		SDS-PAGE plus LC-MS/MS
			"The entire gel row was carefully cut into very small (_x0004_1 mm2) pieces that were then processed for mass spectrometry analysis..."
			"Tryptic peptides were separated by means of nano liquid chromatography using a Proxeon EASY-nLC (Thermo Fisher Scientific, Waltham, MA) with a flow rate..."
			"MS/MS analysis was performed using an LTQ Orbitrap Velos (Thermo Fisher Scientific) with a nanoelectrospray ion source with precursor ion selection in the Orbitrap at 30.000 of resolution, selecting the 15 most intense precursor ions, with a collision energy of 35 in positive ion mode. MS/MS data acquisition was completed using Xcalibur 2.1 (Thermo Fisher Scientific)."
			"Data were processed using Proteome Discoverer 1.2 (Thermo Fisher Scientific). For database searching, processed data were submitted to the in-house Homo sapiens UniProtKB/Swiss-Prot database (released June 2011; 20,211 protein entries) using SEQUEST, version 28.0 (Thermo Fisher Scientific)."
			"Criteria used to accept identification included Min Xcorr..., a false discovery rate (FDR) of 0.05, and two minimum peptides (and at least one unique peptide) matched per protein. FDR was estimated by the Proteome Discoverer application using the conservative approach. This consists of performing and comparing two distinct searches: one against the non-decoy database, and one against the decoy d…

## Sheet: Additional_studies
Supplementary Table S1. Characterization of the proteins collected into the SPERM sample
References to additional studies on sperm proteins reporting proteins in the SPERM sample
References in column N were already included in the Supplementary Table to Amaral et al. (2014).
References in column P were newly added: We used Ensembl's data mining tool BioMart for retrieving gene symbols and Ensembl Stable IDs for subsequent matching between studies (Ensembl Genes 98).
	Species	Reference											References that were already included in the Supplementary Table to Amaral et al. (2014).		New Reference
	Human (Homo sapiens)	de Mateo S, Castillo J, Estanyol JM, Ballesca` JL, Oliva R. Proteomic characterization of the human sperm nucleus. Proteomics 2011; 11: 2714–2726.											yes
		de Mateo S, Martínez-Heredia J, Estanyol JM, Dominguez-Fandos D, Vidal-Taboada JM, Ballescà JL, et al. Marked correlations in protein expression identified by proteomic analysis of human spermatozoa. Proteomics 2007; 7: 4264–4277.											yes
		Lefievre L, Chen Y, Conner SJ, Scott JL, Publicover SJ, Ford WC, et al. Human spermatozoa contain multiple targets for protein S-nitrosylation: an alternative mechanism of the modulation of sperm function by nitric oxide? Proteomics 2007; 7: 3066–3084.											yes
		Martínez-Heredia J, Estanyol JM, Ballescà JL, Oliva R. Proteomic identification of human sperm proteins. Proteomics 2006; 6: 4356–4369.											yes
		Paasch U, Heidenreich F, Pursche T, Kuhlisch E, Kettner K, Grunewald S, et al. Identification of increased amounts of eppin protein complex components in sperm cells of diabetic and obese individuals by difference gel electrophoresis. Mol Cell Proteomics 2011; 10: 1–14.											yes
		Silva JV, Freitas MJ, Correia BR, Korrodi-Gregório L, Patrício A, Pelech S, et al. Profiling signaling proteins in human spermatozoa: biomarker identification for sperm quality evaluation. Fertil Steril. 2015; 104 :845–856.													yes
		Skerget S, Rosenow M, Polpitiya A, Petritis K, Dorus S, Karr TL. The Rhesus macaque (Macaca mulatta) sperm proteome. Mol Cell Proteomics. 2013; 12: 3052–3067.													yes
		Urizar-Arenaza I, Estomba H, Muñoa-Hoyos I, Matorras R, Esposito A, Candenas L, et al. The opioid peptide beta-endorphin stimulates acrosome reaction in human spermatozoa. Andrology. 2016; 4: 143–151.													yes
		Vigodner M, Shrivastava V, Gutstein LE, Schneider J, Nieves E, Goldstein M, et al. Localization and identification of sumoylated proteins in human sperm: excessive sumoylation is a marker of defective spermatozoa. Hum Reprod 2013; 28: 210–223.											yes
		Zhou T, Wang G, Chen M, Zhang M, Guo Y, Yu C, et al. Comparative analysis of macaque and human sperm proteomes: Insights into sperm competition. Proteomics. 2015; 15: 1564–1573.													yes
	Rhesus nacaque (Macaca mulatta)	Skerget S, Rosenow M, Polpitiya A, Petritis K, Dorus S, Karr TL. The Rhesus macaque (Macaca mulatta) sperm proteome. Mol Cell Proteomics. 2013; 12: 3052–3067.													yes
	Pig (Sus scrofa)	Mendonça GA, Filho RM, Souza ET, Schwarz Gaggini T, Silva-Mendonça MCA, Antunes RC, et al. Isolation and identification of proteins from swine sperm chromatin and nuclear matrix. Anim Reprod. 2017; 14: 418-428.													yes

## Sheet: ProteomeXchange
Supplementary Table S1. Characterization of the proteins collected into the SPERM sample
References to proteomic studies on spermatozoa reporting proteins in the SPERM sample, with the raw data deposited at ProteomeXchange
We used Ensembl's data mining tool BioMart for retrieving gene symbols and Ensembl Stable IDs for subsequent matching between studies (Ensembl Genes 98).
	Species	Reference						Dataset containing proteins with matches in the SPERM sample.
	Human (Homo sapiens)	Vandenbrouck Y, Lane L, Carapito C, Duek P, Rondel K, Bruley C, et al. Looking for missing proteins in the proteome of human spermatozoa: an update. J Proteome Res. 2016; 15: 3998–4019.						Supplement pr6b00400_si_004.xlsx
		Guo Y, Jiang J, Zhang H, Wen Y, Zhang H, Cui Y, et al. Proteomic analysis of Dpy19l2-deficient human globozoospermia reveals multiple molecular defects. Proteomics Clin Appl. 2019; 13: e1900007.						prca2088-sup-0002-Data2.xlsx
		Saraswat M, Joenväärä S, Jain T, Tomar AK, Sinha A, Singh S, et al. Human spermatozoa quantitative proteomic signature classifies normo- and asthenozoospermia. Mol Cell Proteomics. 2017; 16: 57–72.						mcp.M116.061028-2
		Shen ZQ, Shi B, Wang TR, Jiao J, Shang XJ, Wu QJ, et al. Characterization of the sperm proteome and reproductive outcomes with in vitro fertilization after a reduction in male ejaculatory abstinence period. Mol Cell Proteomics. 2019; 18(Suppl 1): S109–S117.						134642_2_supp_178392_pcj4nn
								134642_2_supp_178394_pcj4nn
		Urizar-Arenaza I, Osinalde N, Akimov V, Puglia M, Candenas L, Pinto FM, et al. Phosphoproteomic and functional analyses reveal sperm-specific protein changes downstream of kappa opioid receptor in human spermatozoa. Mol Cell Proteomics. 2019; 18(Suppl 1): S118–S131.						141245_1_supp_258489_pk3gnw
								141245_1_supp_258490_pkjfkt
	House mouse (Mus musculus)	Vicens A, Borziak K, Karr TL, Roldan ERS, Dorus S. Comparative sperm proteomics in mouse species with divergent mating systems. Mol Biol Evol. 2017; 34: 1403–1416.						Supplemental Table S1
	Cattle (Bos taurus)	Byrne K, Leahy T, McCulloch R, Colgrave ML, Holland MK. Comprehensive mapping of the bull sperm surface proteome. Proteomics. 2012; 12: 3559–3579.						Tables S1 and S2 in pmic7264-sup-0001-tables1.xls
	Pig (Sus scrofa)	Pérez-Patiño C, Parrilla I, Li J, Barranco I, Martínez EA, Rodriguez-Martínez H, et al. The proteome of pig spermatozoa is remodeled during ejaculation. Mol Cell Proteomics. 2019; 18: 41–50.						138013_1_supp_197331:pplph0.xlsx

## Sheet: Testis_expression
Supplementary Table S1. Characterization of the proteins collected into the SPERM sample
References to testicular expression of proteins in the SPERM sample
Information on expression in the testis was gathered exclusively for proteins, which were determined in a single core reference study.
	Species	Reference
	Human (Homo sapiens)	Tissue Atlas within The Human Protein Atlas at https://www.proteinatlas.org/humanproteome/tissue
	Rat (Rattus norvegicus)	Itman C, Mendis S, Barakat B, Loveland KL. All in the family: TGF-beta family action in testis development. Reproduction. 2006; 132: 233–246.
